# Supplementary material for: Exploring a layered iodide perovskite crystal with centimetered dimension for extended spectral polarization-sensitive photodetection
Source: Royal Society of Chemistry journal article supplement (doi:10.1039/d1tc01291f), 2021-01-01
Supplement: d1tc01291f1.pdf [file d1tc01291f1.pdf]

## Supporting Information

### Exploring a layered iodide perovskite crystal with centimetered dimension for extended spectral polarization-sensitive photodetection

Xiaoqi Li,<sup>a,b,c</sup> Dong Li,<sup>b,c</sup> Yu Peng,<sup>b,c</sup> Yi liu,<sup>b,c</sup> Jiaqi Wang,<sup>b,c</sup> Lina Li,<sup>b,c</sup> Yunpeng Yao,<sup>b,c</sup> Xitao liu,<sup>\*a,b,c</sup> and Junhua Luo<sup>\*a,b,c</sup>

a. College of Chemistry, Fuzhou University, Fuzhou, Fujian 350116, P. R. China.

b. State Key Laboratory of Structure Chemistry, Fujian Institute of Research on the Structure of Matter, Chinese Academy of Sciences, Fuzhou, Fujian 350002, P. R. China.

c. Fujian Science & Technology Innovation Laboratory for Optoelectronic Information of China, Fuzhou, Fujian 350108, P. R. China.

\*Email: xtlou@fjirsm.ac.cn; jhluo@fjirsm.ac.cn;

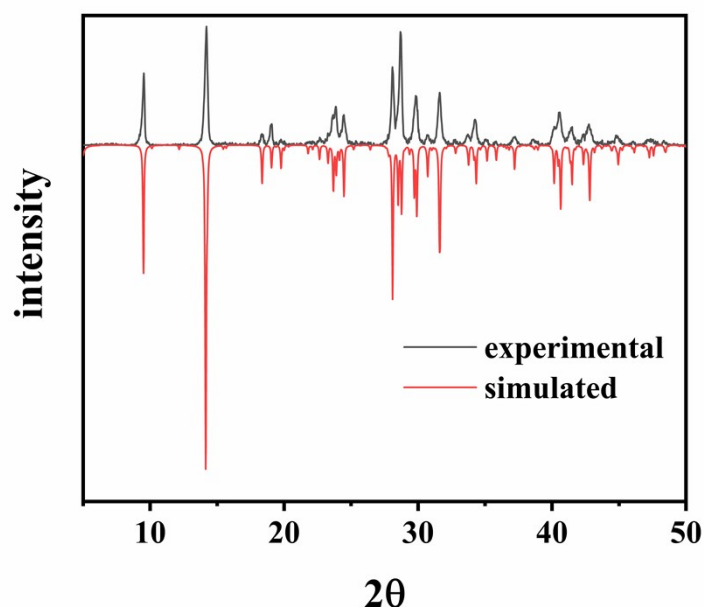

**Figure S1.** Experimental and calculated powder X-ray diffraction patterns of **1**.

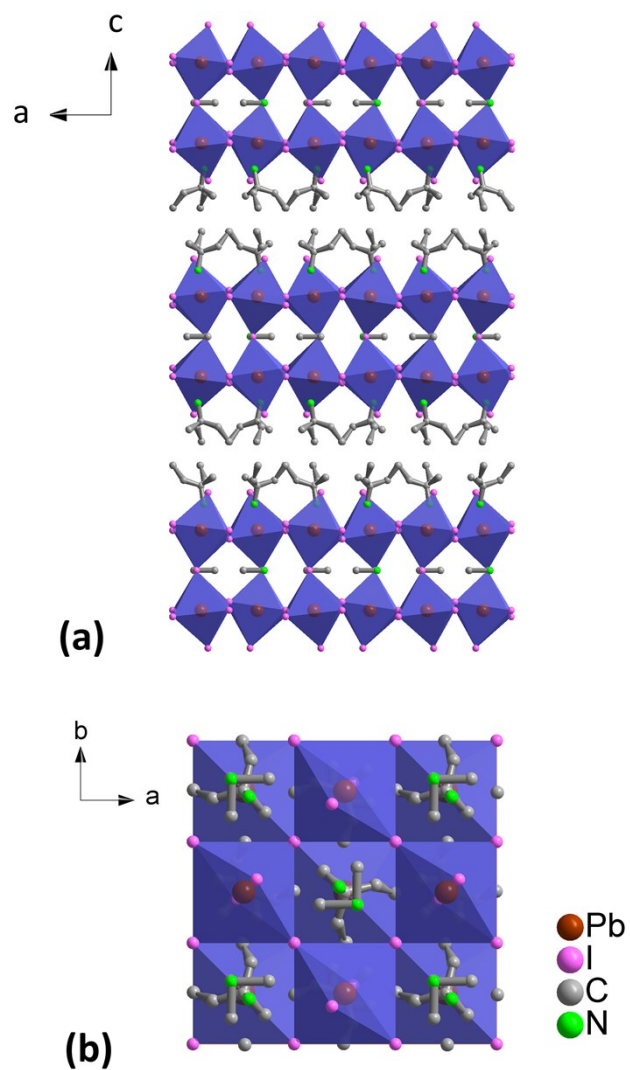

**Figure S2.** Packing diagram of **1** viewed along b-, and c-axes, respectively.

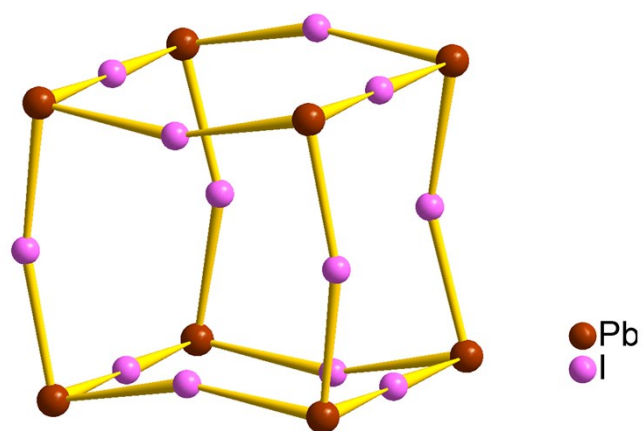

**Figure S3.** Inorganic layer distortion of **1**.

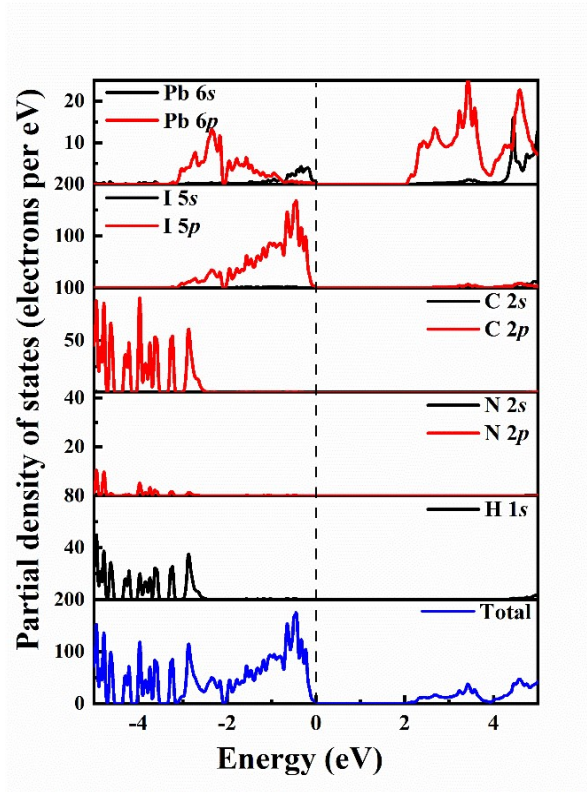

Figure S4. Partial density of states (pDOS) analysis of 1.

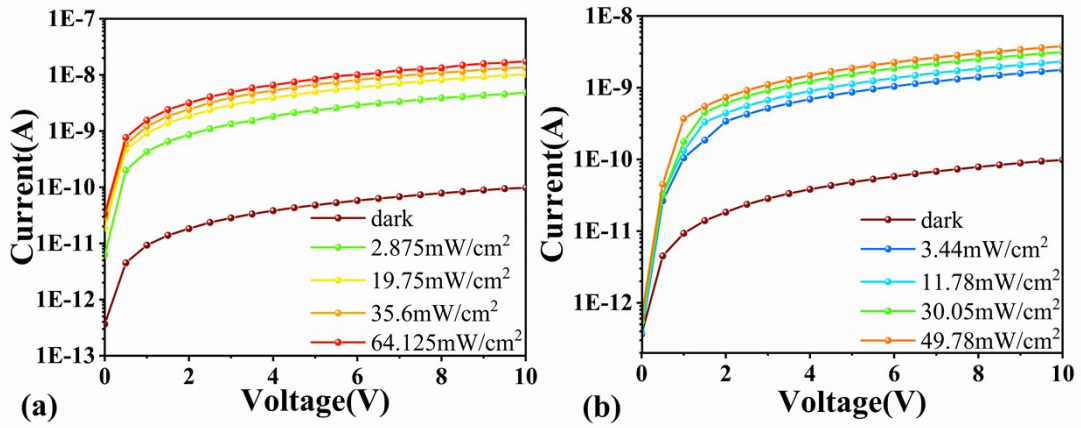

Figure S5.  $I$ - $V$  curves under illumination of 405 nm (a) and 637 nm (b).

**Table S1** Crystal data for **1** collected at 269 K

---

|                                           |                                                                                           |
|-------------------------------------------|-------------------------------------------------------------------------------------------|
| Empirical formula                         | C <sub>9</sub> H <sub>30</sub> I <sub>7</sub> N <sub>3</sub> Pb <sub>2</sub>              |
| Formula weight                            | 1483.04                                                                                   |
| Temperature/K                             | 269.15                                                                                    |
| Crystal system                            | tetragonal                                                                                |
| Space group                               | <i>P4<sub>2</sub>/mnm</i>                                                                 |
| Cell parameters                           | $a = 8.9753(7) \text{ \AA}$<br>$b = 8.9753(7) \text{ \AA}$<br>$c = 37.215(4) \text{ \AA}$ |
| V(Å <sup>3</sup> )                        | 2997.9(6)                                                                                 |
| Z, ρ <sub>cal.</sub> (g/cm <sup>3</sup> ) | 4, 3.286                                                                                  |
| F(000)                                    | 2560.0                                                                                    |
| 2Theta range(°)                           | 4.668 to 46.136                                                                           |
| Limiting indices                          | $-9 \leq h \leq 9$<br>$-9 \leq k \leq 9$<br>$-39 \leq l \leq 41$                          |
| Reflections collected                     | 13302                                                                                     |
| Independent reflections                   | 1183 [ $R_{\text{int}} = 0.0715$ , $R_{\text{sigma}} = 0.0291$ ]                          |
| Data/restraints/parameters                | 1183/51/95                                                                                |
| GOF                                       | 1.068                                                                                     |
| Final R indexes [ $I \geq 2\sigma(I)$ ]   | $R_1 = 0.0426$ , $wR_2 = 0.1066$                                                          |
| Final R indexes [all data]                | $R_1 = 0.0682$ , $wR_2 = 0.1225$                                                          |

---

**Table S2** Bond lengths (Å) for **1** at 269 K

|     |                 |           |    |    |           |
|-----|-----------------|-----------|----|----|-----------|
| Pb1 | I1              | 3.2400(5) | C2 | N2 | 1.473(9)  |
| Pb1 | I2              | 3.1734(3) | C2 | C3 | 1.463(8)  |
| Pb1 | I2 <sup>1</sup> | 3.1734(2) | C2 | C4 | 1.463(8)  |
| Pb1 | I3              | 3.2434(5) | C4 | C5 | 1.488(9)  |
| Pb1 | I4              | 3.2218(5) | N1 | C1 | 1.479(14) |
| Pb1 | I5              | 3.0999(9) |    |    |           |

<sup>1</sup>1-Y,1-X,+Z**Table S3** Bond angles for **1** at 269K

|                 |     |                 |            |                  |     |                  |            |
|-----------------|-----|-----------------|------------|------------------|-----|------------------|------------|
| I1              | Pb1 | I3              | 86.85(3)   | I5               | Pb1 | I2 <sup>1</sup>  | 90.522(14) |
| I2 <sup>1</sup> | Pb1 | I1              | 90.084(7)  | I5               | Pb1 | I3               | 174.53(3)  |
| I2              | Pb1 | I1              | 90.084(7)  | I5               | Pb1 | I4               | 96.09(3)   |
| I2              | Pb1 | I2 <sup>1</sup> | 178.95(3)  | Pb1              | I1  | Pb1 <sup>2</sup> | 154.89(4)  |
| I2              | Pb1 | I3              | 89.488(14) | Pb1              | I2  | Pb1 <sup>3</sup> | 179.02(3)  |
| I2 <sup>1</sup> | Pb1 | I3              | 89.487(14) | Pb1              | I3  | Pb1 <sup>4</sup> | 161.20(5)  |
| I2 <sup>1</sup> | Pb1 | I4              | 89.882(7)  | Pb1 <sup>5</sup> | I4  | Pb1              | 162.45(4)  |
| I2              | Pb1 | I4              | 89.882(7)  | C3               | C2  | N2               | 114.2(6)   |
| I4              | Pb1 | I1              | 176.22(3)  | C4               | C2  | N2               | 114.3(6)   |
| I4              | Pb1 | I3              | 89.37(3)   | C4               | C2  | C3               | 117.4(9)   |
| I5              | Pb1 | I1              | 87.68(3)   | C2               | C4  | C5               | 111.5(7)   |
| I5              | Pb1 | I2              | 90.521(14) |                  |     |                  |            |

<sup>1</sup>1-Y,1-X,+Z; <sup>2</sup>2-X,-Y,+Z; <sup>3</sup>2-X,1-Y,+Z; <sup>4</sup>+X,+Y,1-Z; <sup>5</sup>1-X,1-Y,+Z**Table S4** Polarization-sensitive photodetection performance compared with the reported.

|                                                        | Wavelength<br>nm | Dichroic<br>ratio | R<br>(mA/W) | D*<br>(Jones)           | Ref. |
|--------------------------------------------------------|------------------|-------------------|-------------|-------------------------|------|
| GeSe                                                   | 532              | 1.09              |             |                         | 1    |
|                                                        | 638              | 1.44              |             |                         |      |
|                                                        | 808              | 2.16              |             |                         |      |
| GeSe <sub>2</sub>                                      | 450              | 3.4               |             |                         | 2    |
| p-BP/n-ReS <sub>2</sub>                                | 1064             | 6.44              |             |                         | 3    |
| (BPA) <sub>2</sub> PbBr <sub>4</sub>                   | 377              | 6.8               | 0.1         | 10 <sup>7</sup>         | 4    |
| (n-BA) <sub>2</sub> CsPb <sub>2</sub> Br <sub>7</sub>  | 405              | 1.5               | 39.5        | 1.2×10 <sup>12</sup>    | 5    |
| (CMA) <sub>2</sub> CsPb <sub>2</sub> Br <sub>7</sub>   | 405              | 2.1               | 1.42        | 7.45 × 10 <sup>10</sup> | 6    |
| (FPEA) <sub>2</sub> PbI <sub>4</sub>                   | 520              | 2.1               | 0.0032      | 3.8 × 10 <sup>11</sup>  | 7    |
| (s-BA) <sub>2</sub> (MA)Pb <sub>2</sub> I <sub>7</sub> | 405              | 1.1               | 39.19       | 1.12×10 <sup>11</sup>   | this |
|                                                        | 520              | 1.16              | 97.22       | 2.79×10 <sup>11</sup>   | work |

Herein, BPA is 3-bromopropylammonium; n-BA is n-butylammonium; CMA is (carboxy)cyclohexylmethylammonium; FPEA is p-fluorophenethylammonium;

## References:

1. X. Wang, Y. Li, L. Huang, X. W. Jiang, L. Jiang, H. Dong, Z. Wei, J. Li and W. Hu, *J. Am. Chem. Soc.*, 2017, **139**, 14976-14982.
2. Y. Yang, S. C. Liu, W. Yang, Z. Li, Y. Wang, X. Wang, S. Zhang, Y. Zhang, M. Long, G. Zhang, D. J. Xue, J. S. Hu and L. J. Wan, *J. Am. Chem. Soc.*, 2018, **140**, 4150-4156.
3. W. Zhu, X. Wei, F. Yan, Q. Lv, C. Hu and K. Wang, *J. Semicond.*, 2019, **40**, 092001.
4. C. Ji, D. Dey, Y. Peng, X. Liu, L. Li and J. Luo, *Angew. Chem. Int. Ed.*, 2020, **59**, 18933-18937.
5. J. Wang, Y. Liu, S. Han, Y. Ma, Y. Li, Z. Xu, J. Luo, M. Hong and Z. Sun, *Sci. Bull.*, 2021, **66**, 158-163.
6. Y. Liu, J. Wang, S. Han, X. Liu, M. Li, Z. Xu, W. Guo, M. Hong, J. Luo and Z. Sun, *Eur. J. Chem.*, 2020, **26**, 3494-3498.
7. M. Li, S. Han, B. Teng, Y. Li, Y. Liu, X. Liu, J. Luo, M. Hong and Z. Sun, *Adv. Opt. Mater.*, 2020, **8**, 2000149.
